# Supplementary material for: High-Performance Anion Exchange Chromatography with Pulsed Amperometric Detection (HPAEC–PAD) and Chemometrics for Geographical and Floral Authentication of Honeys from Southern Italy (Calabria region)
Source: PubMed Central journal article supplement (PMC7694965; doi:10.3390/foods9111625), 2020-11-07
Supplement: foods-09-01625-s001.pdf [file foods-09-01625-s001.pdf]

**Table S1** Confusion matrix for Calabrian honey classify based on botanical origin

|            | Acacia | Chestnut | Citrus | Eucalyptus | Sulla | Tot. | % Discrimination index |
|------------|--------|----------|--------|------------|-------|------|------------------------|
| Acacia     | 10     | 0        | 0      | 0          | 0     | 10   | 100.00%                |
| Chestnut   | 0      | 16       | 0      | 0          | 0     | 16   | 100.00%                |
| Citrus     | 0      | 0        | 12     | 0          | 1     | 13   | 92.31%                 |
| Eucalyptus | 0      | 0        | 1      | 9          | 0     | 10   | 90.00%                 |
| Sulla      | 0      | 0        | 1      | 0          | 11    | 12   | 91.67%                 |
| Tot.       | 10     | 16       | 14     | 9          | 12    | 61   | 95.08%                 |

**Table S2** Confusion matrix for Acacia samples

| From \ To       | Acacia Calabria | Acacia China | Acacia Europe | Tot | % exact |
|-----------------|-----------------|--------------|---------------|-----|---------|
| Acacia Calabria | 10              | 0            | 0             | 10  | 100.00% |
| Acacia China    | 0               | 6            | 0             | 6   | 100.00% |
| Acacia Europe   | 0               | 0            | 7             | 7   | 100.00% |
| Tot.            | 10              | 6            | 7             | 23  | 100.00% |
